# Supplementary material for: Strategies for Nitrite Replacement in Fermented Sausages and Effect of High Pressure Processing against Salmonella spp. and Listeria innocua
Source: MDPI journal article supplement (doi:10.3390/foods10112617), 2021-10-28
Supplement: s1 [file s1]

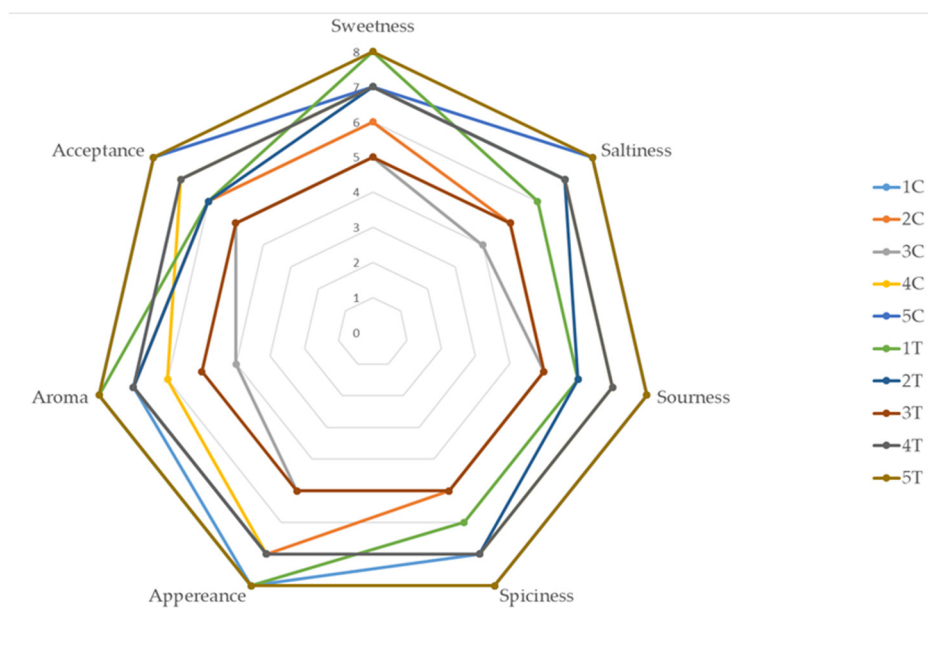

**Figure S1:** Spider chart of sensory attributes for the ten batches. Additives used for different batches 1: lactic acid; 2: glucono-D-lactone; 3: sodium acetate/sodium lactate; 4: nitrites from vegetables (80 ppm); 5: sodium nitrite (80 ppm). T: traditional ripening; C: cold ripening.
