# Supplementary material for: Strategies for Nitrite Replacement in Fermented Sausages and Effect of High Pressure Processing against Salmonella spp. and Listeria innocua
Source: MDPI journal article supplement (doi:10.3390/foods10112617), 2021-10-28
Supplement: s1 [file s1]

**Table S2:** pH and a<sub>w</sub> values for the ten batches

| <b>pH</b>              |                             |                              |                             |                             |                             |                             |                             |                              |                             |                             |
|------------------------|-----------------------------|------------------------------|-----------------------------|-----------------------------|-----------------------------|-----------------------------|-----------------------------|------------------------------|-----------------------------|-----------------------------|
| <b>Time<br/>(days)</b> | <b>1C</b>                   | <b>2C</b>                    | <b>3C</b>                   | <b>4C</b>                   | <b>5C</b>                   | <b>1T</b>                   | <b>2T</b>                   | <b>3T</b>                    | <b>4T</b>                   | <b>5T</b>                   |
| 0                      | 5.24±0.02 <sup>a,a</sup>    | 5.14±0.03 <sup>a,a</sup>     | 5.56±0.04 <sup>b,b</sup>    | 5.65±0.04 <sup>bc,b</sup>   | 5.69±0.01 <sup>c,c</sup>    | 5.25±0.04 <sup>a,a</sup>    | 5.14±0.03 <sup>a,ab</sup>   | 5.56±0.04 <sup>b,c</sup>     | 5.65±0.04 <sup>bc,c</sup>   | 5.68±0.04 <sup>c,c</sup>    |
| 4                      | 5.24±0.02 <sup>c,a</sup>    | 5.13±0.03 <sup>ab,a</sup>    | 5.52±0.03 <sup>d,ab</sup>   | 5.60±0.02 <sup>d,b</sup>    | 5.56±0.03 <sup>d,b</sup>    | 5.17±0.03 <sup>abc,a</sup>  | 5.11±0.03 <sup>a,a</sup>    | 5.22±0.01 <sup>bc,a</sup>    | 5.19±0.01 <sup>abc,a</sup>  | 5.14±0.02 <sup>ab,a</sup>   |
| 15                     | 5.19±0.01 <sup>b,a</sup>    | 5.19±0.01 <sup>b,a</sup>     | 5.42±0.02 <sup>c,a</sup>    | 5.36±0.03 <sup>c,a</sup>    | 5.34±0.03 <sup>c,a</sup>    | 5.16±0.01 <sup>ab,a</sup>   | 5.09±0.02 <sup>a,a</sup>    | 5.23±0.01 <sup>b,a</sup>     | 5.22±0.02 <sup>b,ab</sup>   | 5.17±0.01 <sup>b,a</sup>    |
| 30                     | 5.35±0.01 <sup>bc,b</sup>   | 5.33±0.04 <sup>b,b</sup>     | 5.48±0.01 <sup>d,ab</sup>   | 5.47±0.02 <sup>d,a</sup>    | 5.43±0.02 <sup>cd,a</sup>   | 5.22±0.01 <sup>a,a</sup>    | 5.21±0.01 <sup>a,b</sup>    | 5.34±0.01 <sup>bc,b</sup>    | 5.33±0.04 <sup>b,b</sup>    | 5.30±0.02 <sup>ab,b</sup>   |
| <b>a<sub>w</sub></b>   |                             |                              |                             |                             |                             |                             |                             |                              |                             |                             |
| <b>Time<br/>(days)</b> | <b>1C</b>                   | <b>2C</b>                    | <b>3C</b>                   | <b>4C</b>                   | <b>5C</b>                   | <b>1T</b>                   | <b>2T</b>                   | <b>3T</b>                    | <b>4T</b>                   | <b>5T</b>                   |
| 0                      | 0.977±0.001 <sup>ab,d</sup> | 0.975±0.001 <sup>a,c</sup>   | 0.978±0.006 <sup>ab,d</sup> | 0.978±0.001 <sup>ab,d</sup> | 0.980±0.002 <sup>b,d</sup>  | 0.977±0.001 <sup>ab,d</sup> | 0.975±0.001 <sup>ab,d</sup> | 0.977±0.001 <sup>a,a</sup>   | 0.978±0.001 <sup>ab,d</sup> | 0.980±0.002 <sup>b,d</sup>  |
| 4                      | 0.965±0.005 <sup>a,c</sup>  | 0.962±0.004 <sup>a,c</sup>   | 0.960±0.002 <sup>a,c</sup>  | 0.959±0.003 <sup>a,c</sup>  | 0.954±0.004 <sup>a,c</sup>  | 0.965±0.002 <sup>a,c</sup>  | 0.965±0.001 <sup>a,c</sup>  | 0.511±0.633 <sup>a,a</sup>   | 0.961±0.003 <sup>a,c</sup>  | 0.965±0.001 <sup>a,c</sup>  |
| 15                     | 0.936±0.001 <sup>e,b</sup>  | 0.935±0.002 <sup>de,b</sup>  | 0.936±0.003 <sup>e,b</sup>  | 0.928±0.001 <sup>bc,b</sup> | 0.928±0.001 <sup>cd,b</sup> | 0.929±0.001 <sup>cd,b</sup> | 0.928±0.001 <sup>cd,b</sup> | 0.930±0.002 <sup>cde,a</sup> | 0.923±0.003 <sup>a,b</sup>  | 0.922±0.001 <sup>ab,b</sup> |
| 30                     | 0.898±0.002 <sup>d,a</sup>  | 0.894±0.003 <sup>bcd,a</sup> | 0.897±0.001 <sup>d,a</sup>  | 0.897±0.002 <sup>d,a</sup>  | 0.895±0.004 <sup>cd,a</sup> | 0.880±0.003 <sup>a,a</sup>  | 0.879±0.001 <sup>a,a</sup>  | 0.885±0.002 <sup>abc,a</sup> | 0.882±0.005 <sup>ab,a</sup> | 0.880±0.004 <sup>a,a</sup>  |

Letters as superscripts indicate significant differences by column based on ANOVA and Tukey's test ( $p < 0.05$ ) by row (first) and by column (second). Additives used for different batches are indicated as 1: lactic acid; 2: glucono-D-lactone; 3: sodium acetate/sodium lactate; 4: nitrites from vegetables (80 ppm); 5: sodium nitrite (80 ppm). Groups following different ripening conditions are indicated as T: traditional ripening; C: cold ripening.
