# Supplementary material for: Strategies for Nitrite Replacement in Fermented Sausages and Effect of High Pressure Processing against Salmonella spp. and Listeria innocua
Source: MDPI journal article supplement (doi:10.3390/foods10112617), 2021-10-28
Supplement: s1 [file s1]

**Table S1:** Counts (log CFU/g) of lactobacilli, staphylococci coagulase negative (CNS), and *Enterobacteriaceae* for the ten batches.

| <b>Lactobacilli</b>       |                            |                             |                          |                           |                            |                           |                            |                             |                           |                           |
|---------------------------|----------------------------|-----------------------------|--------------------------|---------------------------|----------------------------|---------------------------|----------------------------|-----------------------------|---------------------------|---------------------------|
| <b>Time (days)</b>        | <b>1C</b>                  | <b>2C</b>                   | <b>3C</b>                | <b>4C</b>                 | <b>5C</b>                  | <b>1T</b>                 | <b>2T</b>                  | <b>3T</b>                   | <b>4T</b>                 | <b>5T</b>                 |
| 0                         | 6.57±0.04 <sup>a,a</sup>   | 6.51±0.01 <sup>a,a</sup>    | 6.54±0.06 <sup>a,a</sup> | 6.62±0.06 <sup>a,a</sup>  | 7.07±0.73 <sup>a,a</sup>   | 6.57±0.04 <sup>a,a</sup>  | 6.51±0.01 <sup>a,a</sup>   | 6.54±0.06 <sup>a,a</sup>    | 6.62±0.06 <sup>a,a</sup>  | 7.07±0.73 <sup>a,a</sup>  |
| 4                         | 7.84±0.08 <sup>a,b</sup>   | 7.87±0.01 <sup>ab,b</sup>   | 7.76±0.08 <sup>a,b</sup> | 7.71±0.11 <sup>a,b</sup>  | 7.84±0.03 <sup>a,a</sup>   | 8.33±0.05 <sup>c,b</sup>  | 8.14±0.09 <sup>bc,b</sup>  | 8.36±0.05 <sup>c,b</sup>    | 7.89±0.05 <sup>ab,b</sup> | 8.17±0.09 <sup>c,a</sup>  |
| 15                        | 8.17±0.13 <sup>abc,b</sup> | 8.24±0.06 <sup>abcd,c</sup> | 7.98±0.02 <sup>a,b</sup> | 7.92±0.08 <sup>a,bc</sup> | 8.09±0.16 <sup>ab,a</sup>  | 8.62±0.08 <sup>e,c</sup>  | 8.47±0.06 <sup>cde,c</sup> | 8.39±0.07 <sup>bcde,b</sup> | 8.52±0.03 <sup>de,c</sup> | 8.55±0.04 <sup>de,b</sup> |
| 30                        | 8.31±0.27 <sup>a,b</sup>   | 8.28±0.12 <sup>a,c</sup>    | 8.09±0.16 <sup>a,b</sup> | 8.23±0.13 <sup>a,c</sup>  | 8.83±0.62 <sup>a,a</sup>   | 8.58±0.04 <sup>a,c</sup>  | 8.48±0.07 <sup>a,c</sup>   | 8.37±0.10 <sup>a,b</sup>    | 8.53±0.05 <sup>a,c</sup>  | 8.56±0.03 <sup>a,b</sup>  |
| <b>CNS</b>                |                            |                             |                          |                           |                            |                           |                            |                             |                           |                           |
| <b>Time (days)</b>        | <b>1C</b>                  | <b>2C</b>                   | <b>3C</b>                | <b>4C</b>                 | <b>5C</b>                  | <b>1T</b>                 | <b>2T</b>                  | <b>3T</b>                   | <b>4T</b>                 | <b>5T</b>                 |
| 0                         | 6.38±0.23 <sup>a,a</sup>   | 6.31±0.14 <sup>a,a</sup>    | 6.47±0.00 <sup>a,a</sup> | 6.49±0.01 <sup>a,a</sup>  | 6.52±0.07 <sup>a,a</sup>   | 6.38±0.23 <sup>a,a</sup>  | 6.31±0.14 <sup>a,a</sup>   | 6.47±0.00 <sup>a,a</sup>    | 6.49±0.01 <sup>a,a</sup>  | 6.52±0.07 <sup>a,a</sup>  |
| 4                         | 7.44±0.17 <sup>abc,b</sup> | 7.48±0.09 <sup>abc,b</sup>  | 7.33±0.01 <sup>a,a</sup> | 7.40±0.04 <sup>ab,b</sup> | 7.45±0.10 <sup>abc,b</sup> | 7.71±0.04 <sup>cd,b</sup> | 7.69±0.03 <sup>cd,b</sup>  | 7.63±0.04 <sup>bcd,b</sup>  | 7.81±0.01 <sup>d,b</sup>  | 7.87±0.02 <sup>d,b</sup>  |
| 15                        | 7.75±0.01 <sup>ab,b</sup>  | 7.73±0.02 <sup>ab,b</sup>   | 7.63±0.03 <sup>a,a</sup> | 7.76±0.04 <sup>ab,c</sup> | 7.78±0.03 <sup>ab,c</sup>  | 7.80±0.05 <sup>ab,b</sup> | 7.88±0.04 <sup>b,b</sup>   | 7.78±0.10 <sup>ab,b</sup>   | 7.76±0.04 <sup>ab,b</sup> | 7.83±0.06 <sup>b,b</sup>  |
| 30                        | 7.61±0.02 <sup>a,b</sup>   | 7.66±0.06 <sup>a,b</sup>    | 7.37±0.68 <sup>a,b</sup> | 7.53±0.04 <sup>a,b</sup>  | 7.58±0.10 <sup>a,bc</sup>  | 7.89±0.03 <sup>a,b</sup>  | 7.88±0.07 <sup>a,b</sup>   | 7.60±0.12 <sup>a,b</sup>    | 7.65±0.10 <sup>a,b</sup>  | 7.83±0.03 <sup>a,bc</sup> |
| <b>Enterobacteriaceae</b> |                            |                             |                          |                           |                            |                           |                            |                             |                           |                           |
| <b>Time (days)</b>        | <b>1C</b>                  | <b>2C</b>                   | <b>3C</b>                | <b>4C</b>                 | <b>5C</b>                  | <b>1T</b>                 | <b>2T</b>                  | <b>3T</b>                   | <b>4T</b>                 | <b>5T</b>                 |
| 0                         | 1.98±0.03 <sup>a,b</sup>   | 1.95±0.07 <sup>a,c</sup>    | 1.30±0.43 <sup>a,b</sup> | 1.24±0.34 <sup>a,a</sup>  | 1.95±0.07 <sup>a,c</sup>   | 1.98±0.03 <sup>a,b</sup>  | 1.95±0.07 <sup>a,c</sup>   | 1.30±0.43 <sup>a,b</sup>    | 1.24±0.34 <sup>a,a</sup>  | 1.95±0.07 <sup>a,b</sup>  |
| 4                         | 2.00±0.06 <sup>a,b</sup>   | 1.59±0.16 <sup>a,b</sup>    | 1.70±0.00 <sup>a,b</sup> | 0.74±1.04 <sup>a,a</sup>  | 1.65±0.07 <sup>a,bc</sup>  | 1.97±0.10 <sup>a,b</sup>  | 1.65±0.07 <sup>a,b</sup>   | 1.59±0.16 <sup>a,b</sup>    | 0.80±1.13 <sup>a,a</sup>  | 1.54±0.09 <sup>a,b</sup>  |
| 15                        | 1.77±0.10 <sup>d,b</sup>   | 1.48±0.00 <sup>c,b</sup>    | 1.54±0.09 <sup>c,b</sup> | 1.00±0.00 <sup>b,a</sup>  | 1.39±0.12 <sup>c,b</sup>   | <1±0.00 <sup>a,a</sup>    | <1±0.00 <sup>a,a</sup>     | <1±0.00 <sup>a,a</sup>      | <1±0.00 <sup>a,a</sup>    | <1±0.00 <sup>a,a</sup>    |
| 30                        | <1±0.00 <sup>a,a</sup>     | <1±0.00 <sup>a,a</sup>      | <1±0.00 <sup>a,a</sup>   | <1±0.00 <sup>a,a</sup>    | <1±0.00 <sup>a,a</sup>     | <1±0.00 <sup>a,a</sup>    | <1±0.00 <sup>a,a</sup>     | <1±0.00 <sup>a,a</sup>      | <1±0.00 <sup>a,a</sup>    | <1±0.00 <sup>a,a</sup>    |

Letters as superscripts indicate significant differences by column based on ANOVA and Tukey's test ( $p < 0.05$ ) by row (first) and by column (second). Additives used for different batches are indicated as 1: lactic acid; 2: glucono-D-lactone; 3: sodium acetate/sodium lactate; 4: nitrites from vegetables (80 ppm); 5: sodium nitrite (80 ppm). Groups following different ripening conditions are indicated as T: traditional ripening; C: cold ripening.
